# Supplementary material for: The Northumberland Exercise Referral Scheme as a Universal Community Weight Management Programme: A Mixed Methods Exploration of Outcomes, Expectations and Experiences across a Social Gradient
Source: Int J Environ Res Public Health. 2020 Jul 23;17(15):5297. doi: 10.3390/ijerph17155297 (PMC7432420; doi:10.3390/ijerph17155297)
Supplement: Supplementary file 1 [file ijerph-17-05297-s001.pdf]

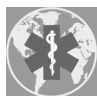

Supplementary file

# The Northumberland Exercise Referral Scheme as a universal community weight management programme: a mixed methods exploration of outcomes, expectations and experiences across a social gradient.

Caroline J. Dodd-Reynolds<sup>1,2,3\*</sup>, Dimitris Vallis<sup>3</sup> Adetayo Kasim<sup>2,3,4</sup>, Nasima Akhter<sup>2,4</sup> and Coral L. Hanson<sup>5</sup>

<sup>1</sup>Department of Sport and Exercise Sciences, Durham University, Durham, UK; [caroline.dodd-reynolds@durham.ac.uk](mailto:caroline.dodd-reynolds@durham.ac.uk)

<sup>2</sup>Wolfson Research Institute for Health and Wellbeing Physical Activity Special Interest Group, Durham University, Durham, UK.

<sup>3</sup>Durham Research Methods Centre, Durham University, UK; [dimitris.vallis@durham.ac.uk](mailto:dimitris.vallis@durham.ac.uk)

<sup>4</sup>Department of Anthropology, Durham University, UK; [a.s.kasim@durham.ac.uk](mailto:a.s.kasim@durham.ac.uk)  
[nasima.akhter@durham.ac.uk](mailto:nasima.akhter@durham.ac.uk)

<sup>5</sup>School of Health and Social Care, Edinburgh Napier University, Edinburgh, UK; [C.Hanson@napier.ac.uk](mailto:C.Hanson@napier.ac.uk)

\*Correspondence: [caroline.dodd-reynolds@durham.ac.uk](mailto:caroline.dodd-reynolds@durham.ac.uk)

Table S1. Patterns for missing data.

| Pattern | Weight % (n) | BMI % (n) | Waist % (n) | Godin % (n) | Godin (HCS) % (n) |
|---------|--------------|-----------|-------------|-------------|-------------------|
| OOO     | 33.99%       | 33.77%    | 33.77%      | 14.32%      | 15.38%            |
| OOM     | 12.04%       | 12.00%    | 11.71%      | 20.41%      | 19.46%            |
| OMO     | 4.15%        | 4.26%     | 4.07%       | 1.36%       | 1.25%             |
| MOO     | 0.48%        | 0.48%     | 0.48%       | 0.29%       | 0.26%             |
| OMM     | 48.35%       | 48.24%    | 47.76%      | 58.48%      | 58.66%            |
| MOM     | 0.18%        | 0.15%     | 0.33%       | 0.73%       | 0.66%             |
| MMO     | 0.00%        | 0.04%     | 0.00%       | 0.00%       | 0.15%             |
| MMM     | 0.81%        | 1.06%     | 1.87%       | 4.26%       | 4.19%             |

M: Missing; O: Observed. E.g. OOO Observed data for participant at all three timepoints; OOM, Missing data for participant only at timepoint 3.
